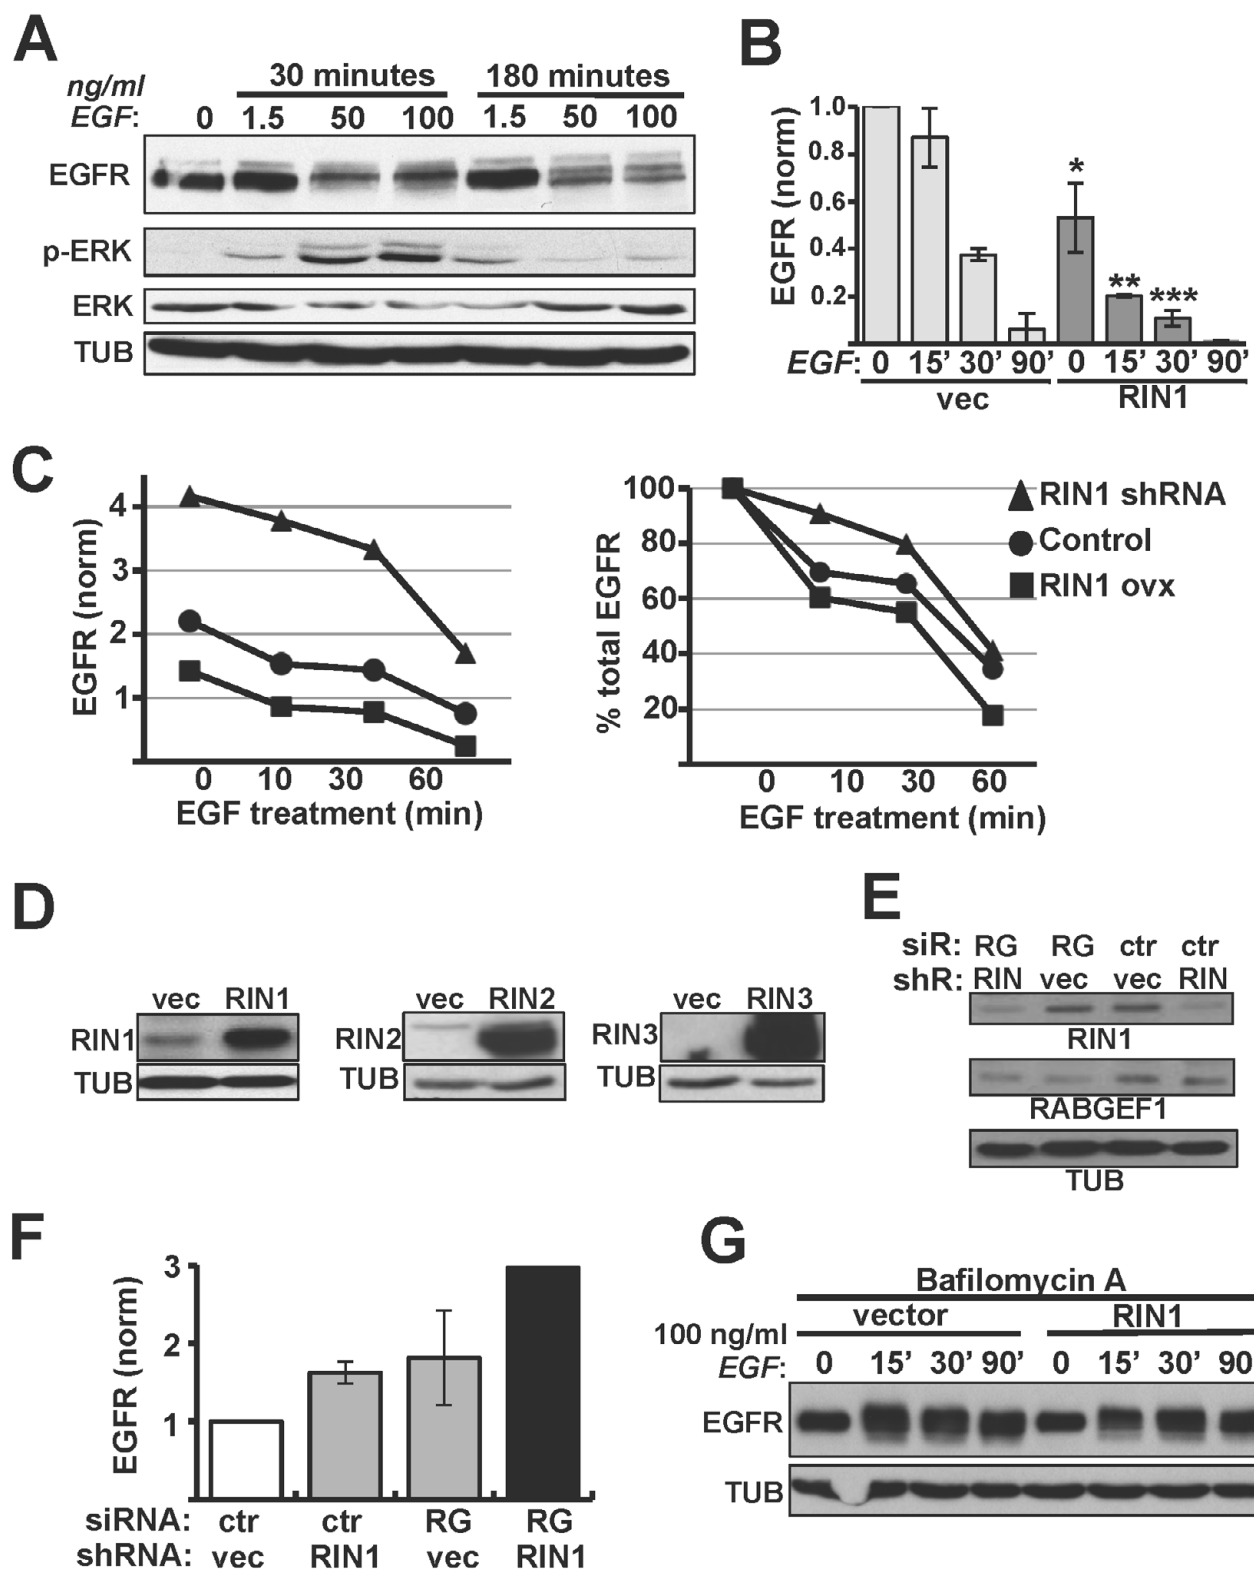

**Fig. S1. EGF-induced down regulation of EGFR is controlled by RIN1.** **A.** HeLa cells were stimulated with the indicated concentrations of EGF for the indicated times. Cell lysates were immunoblotted for EGFR, tubulin, total ERK1/2 and p-ERK1/2. **B.** EGFR quantification, normalized to tubulin, in HeLa cells transduced with vector or RIN1 following 100 ng/ml EGF treatment for the indicated times. Mean of three experiments  $\pm$ SD (\* $p$ <0.05, \*\* $p$ <0.005, \*\*\* $p$ <0.0005). **C.** Left: EGFR levels from Figure 1A, normalized to tubulin. Right: same data plotted as percent change in EGFR level. **D.** Vector transduced HeLa cells were immunoblotted for endogenous RIN1, RIN2 or RIN3. Cells transfected with RIN1, RIN2 or RIN3 were used as positive controls. **E.** Vector and RIN1-shRNA cells transfected with control or RABGEF1 (RG) siRNA, immunoblotted for RIN1, RABGEF1 or TUB. **F.** Quantification of EGFR levels, 30 minutes post 100 ng/ml EGF stimulation, relative to unstimulated cells, expressed as a fraction of control cells. RIN1 shRNA and RABGEF1 siRNA data are from three independent experiments. **G.** HeLa cells transduced with vector or RIN1 were pretreated with Bafilomycin A, stimulated with 100 ng/ml EGF for the indicated time, and lysates immunoblotted for EGFR. EGFR activation was confirmed by p-ERK immunoblot (data not shown).

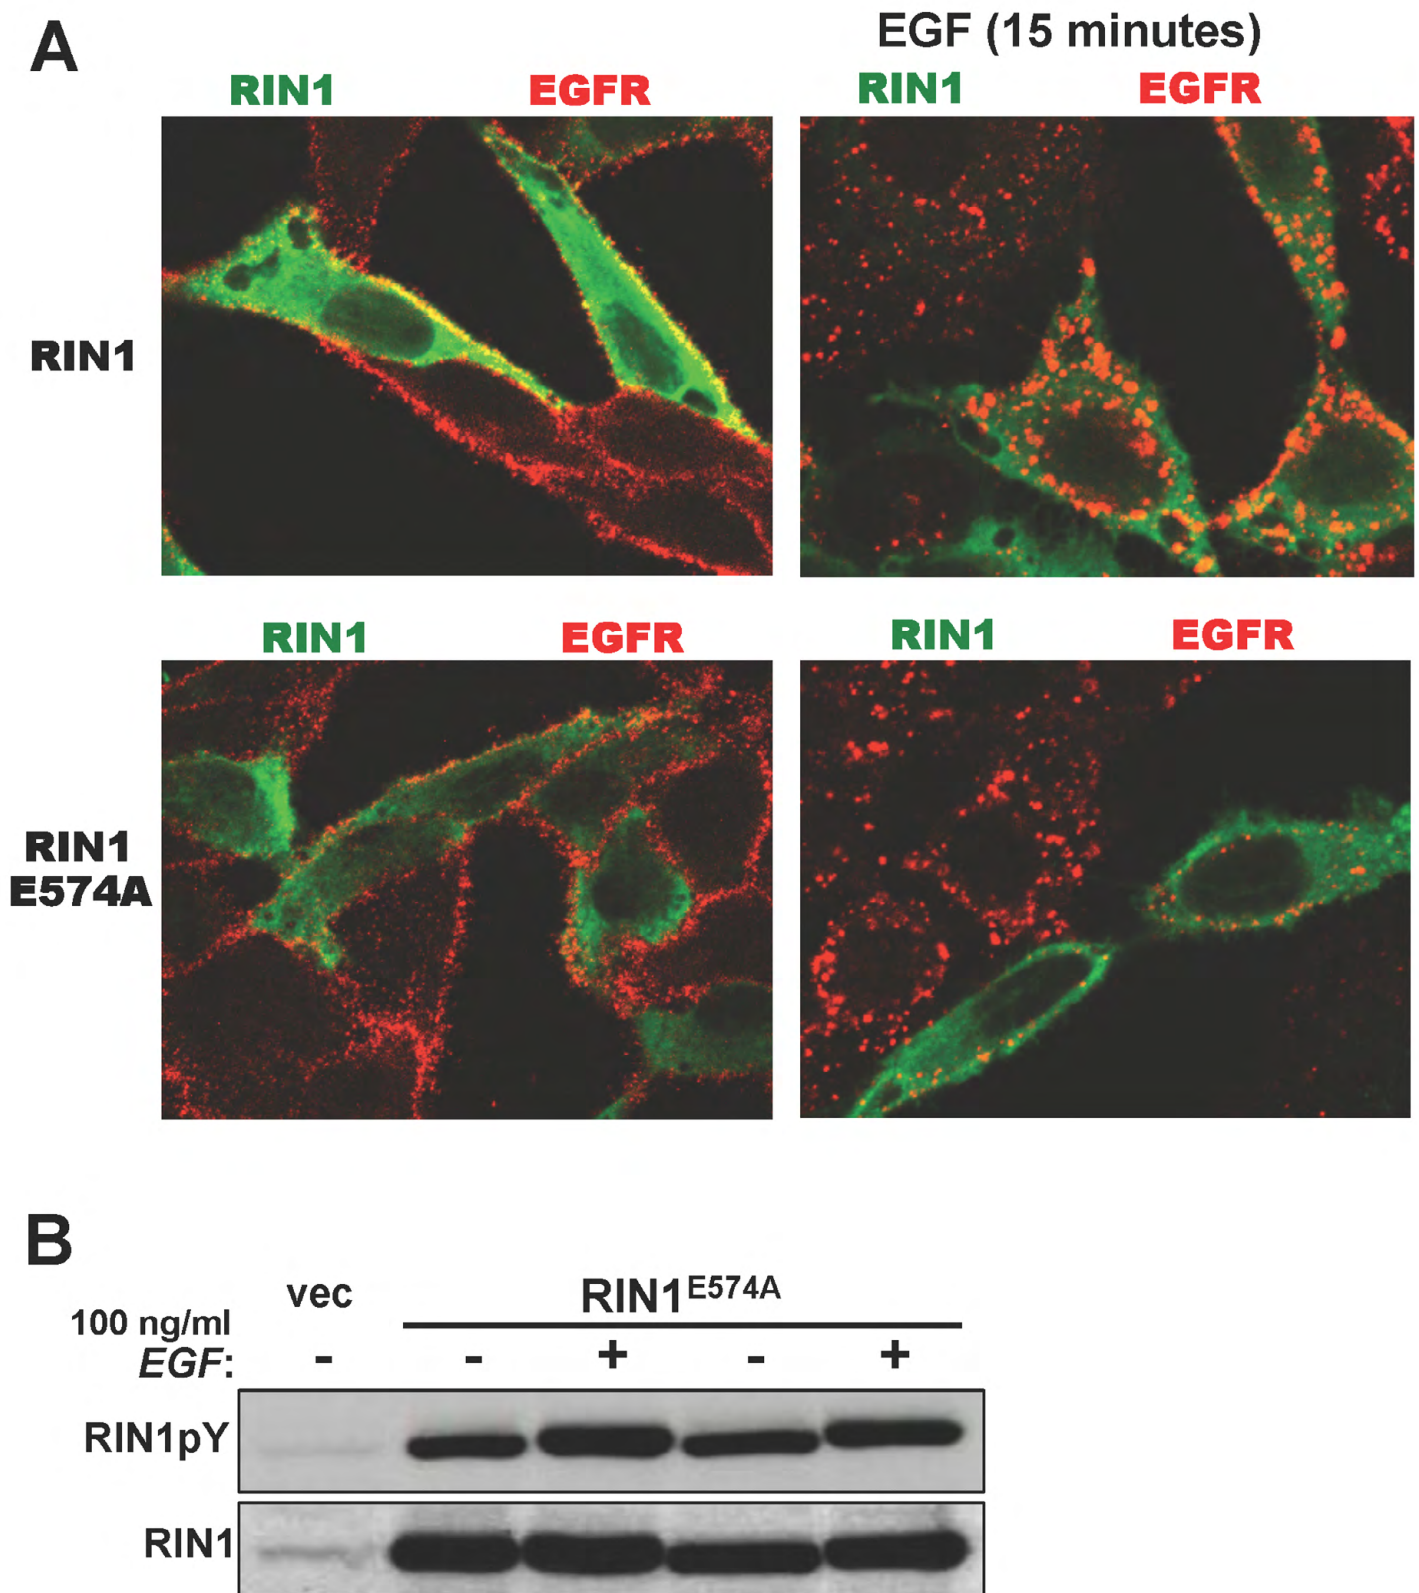

**Fig. S2. RIN1→RAB5 signaling regulates early endosome size.** **A.** HeLa cells stably transduced with RIN1 or RIN1<sup>E574A</sup> were untreated or stimulated with 100 ng/ml EGF conjugated to AlexaFluor 647 (red) for 15 minutes, then stained for RIN1 (green). Untransduced cells serve as internal controls. **B.** HeLa cells transduced with vector, RIN1 or RIN1<sup>E574A</sup> were untreated or stimulated with 100 ng/ml EGF for 15 minutes. Cell lysates were immunoblotted for pY-RIN1 and total RIN1. EGFR activation was confirmed by p-ERK immunoblot (data not shown).

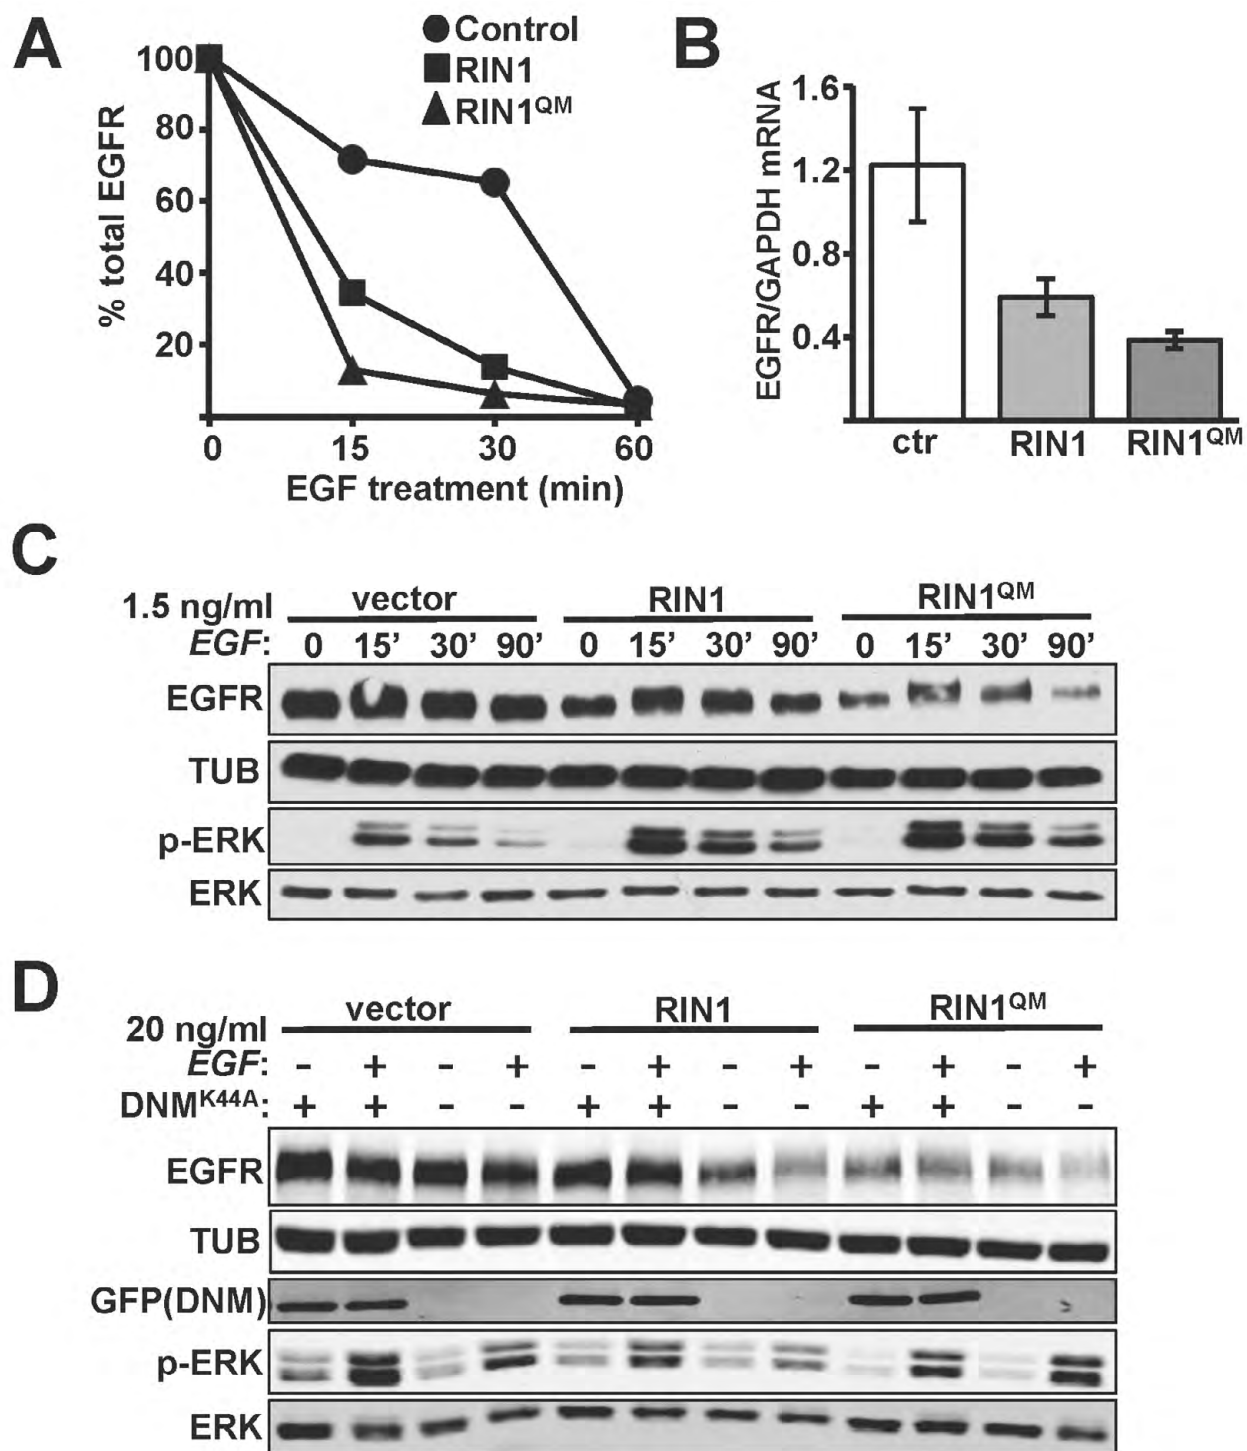

**Fig. S3. RIN1<sup>QM</sup> causes accelerated EGFR degradation.** **A.** Quantification of EGFR degradation rate (Figure 3B data). **B.** EGFR mRNA levels normalized to GAPDH mRNA in vector, RIN1 or RIN1<sup>QM</sup> HeLa cells. The data represent two independent qRT-PCR experiments, each performed in duplicate. **C.** HeLa cells transduced with vector, RIN1 or RIN1<sup>QM</sup> were stimulated with 1.5 ng/ml EGF for the indicated times and lysates immunoblotted for EGFR, total ERK1/2 and p-ERK1/2. **D.** Vector, RIN1 or RIN1<sup>QM</sup> HeLa cells were transfected with empty vector or dominant-negative dynamin (DNM<sup>K44A</sup>). Cells were stimulated, or not, with 20 ng/ml EGF for 60 minutes and lysates immunoblotted for EGFR, TUB, total ERK1/2, p-ERK1/2 and GFP (dynamin).

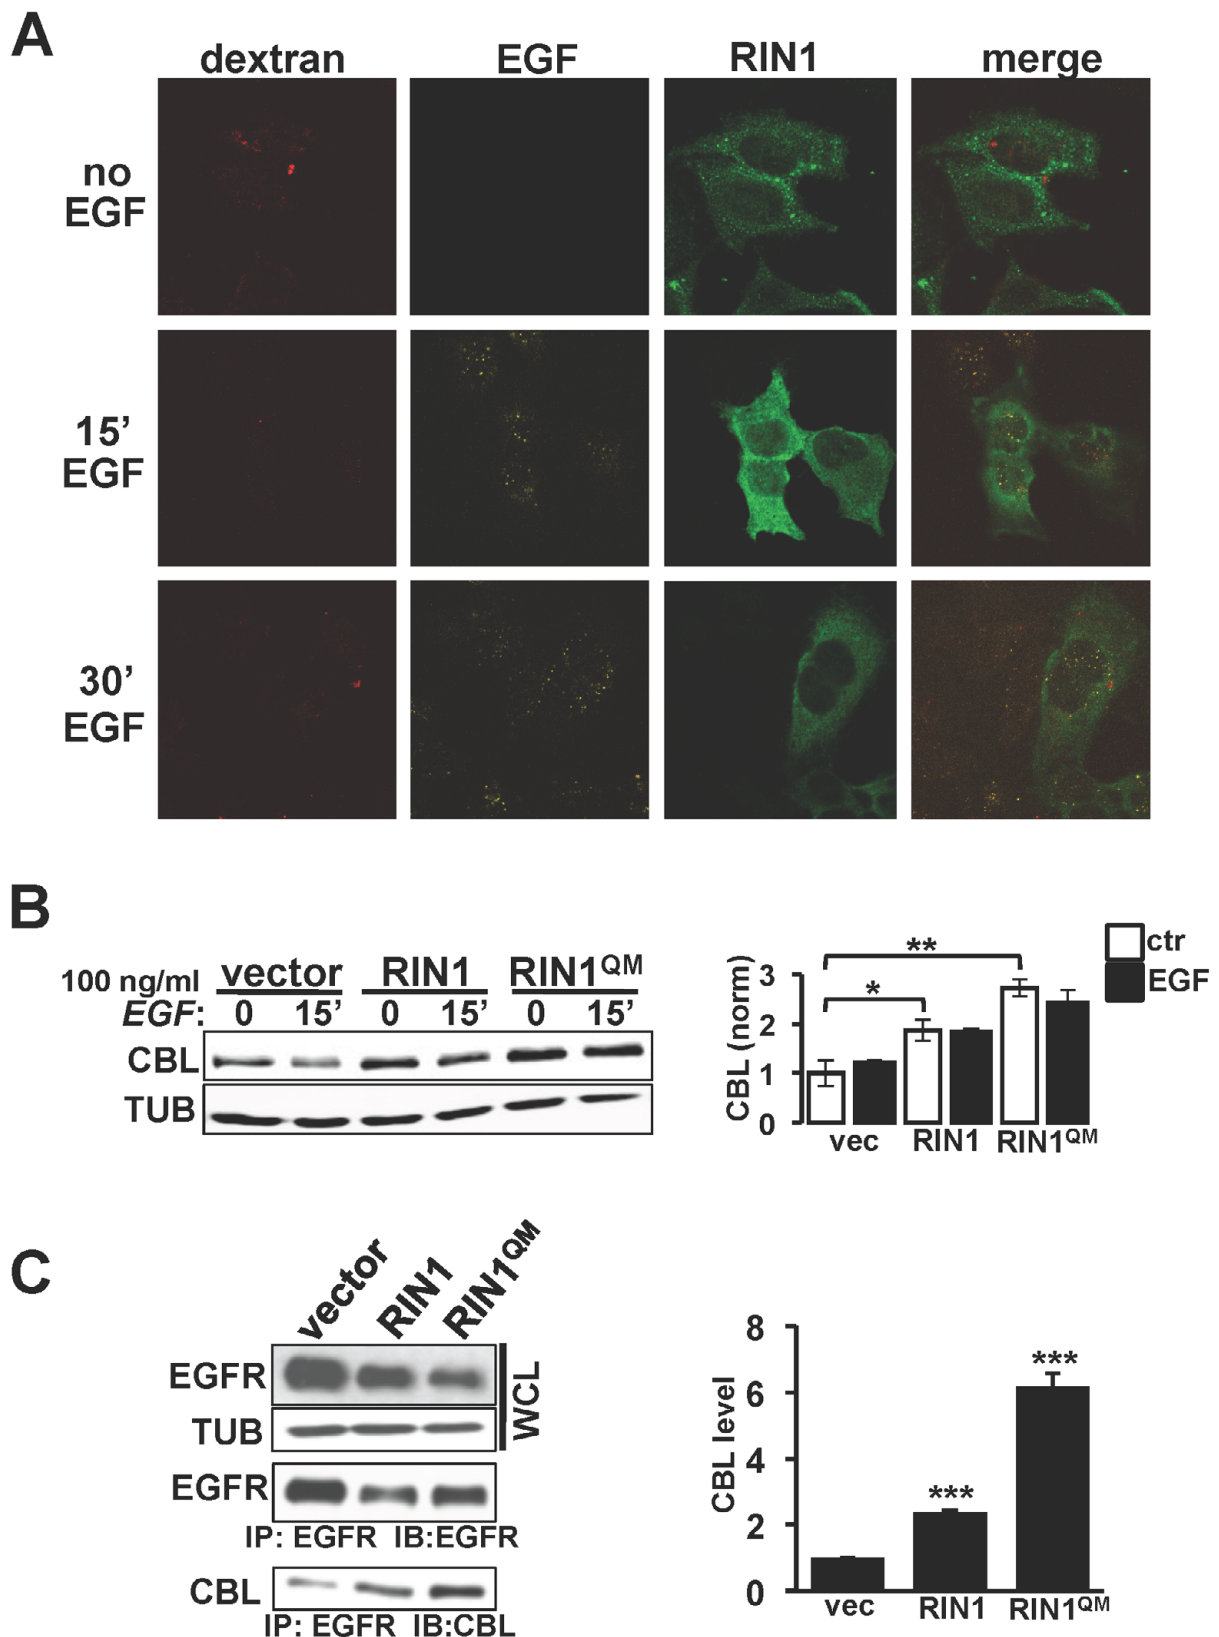

**Fig. S4. RIN1<sup>QM</sup> effects in HeLa cells.** **A.** Control for Figure 5D. HeLa cells transduced with RIN1 were pulsed with 20 ng/ml EGF and 1mg/ml Dextran for 5 minutes, as with RIN1<sup>QM</sup> cells in Figure 5D and chased in serum-free medium for the indicated time. Untransfected cells serve as internal controls. red=dextran; yellow=EGF, green=RIN1. **B.** Left: Transduced HeLa cells were stimulated, or not, with 100 ng/ml EGF for 15 min. Lysates were immunoblotted with anti-CBL or anti-TUB. Right: CBL levels normalized to TUB (mean of three experiments  $\pm$  SD). EGFR activation was confirmed by p-ERK immunoblot (data not shown). **C.** Left: Transduced HeLa cells (as in B) were serum-starved overnight and lysates probed for EGFR or TUB. Anti-EGFR immunoprecipitates were blotted with anti-EGFR or anti-CBL. Right: Quantification of CBL associated with EGFR. Mean of three experiments  $\pm$  SD. \* p<0.05; \*\* p<0.005; \*\*\* p<0.0005.

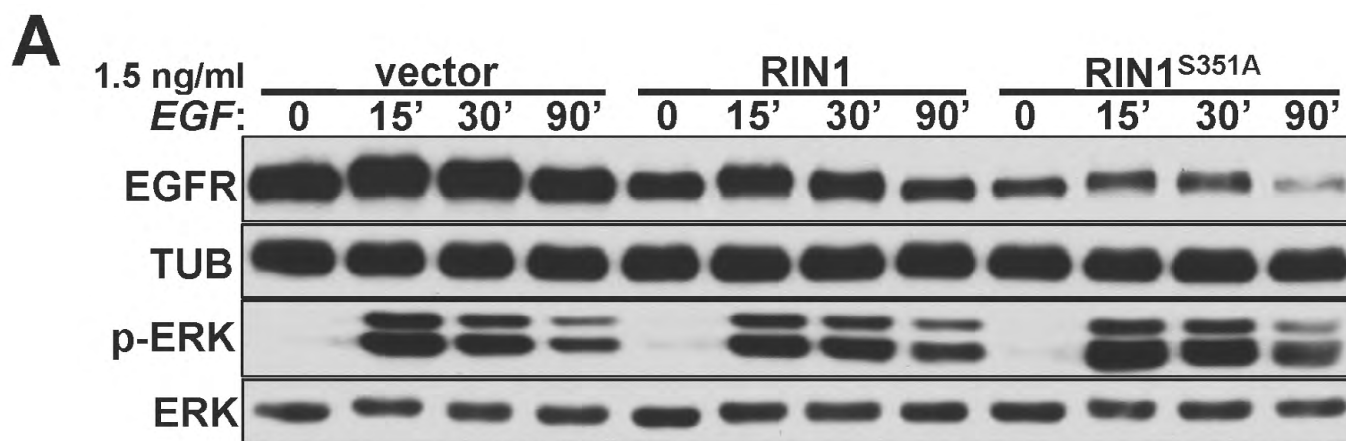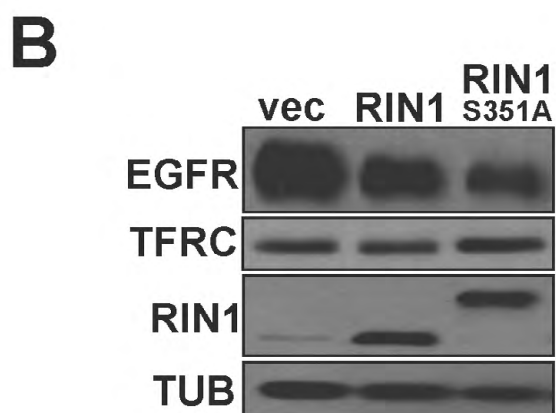

**Fig. S5. Plasma membrane localization of RIN1 promotes EGFR degradation** **A.** HeLa cells transduced with vec, RIN1 or RIN1<sup>S351A</sup> were stimulated with 1.5 ng/ml EGF for the indicated times and lysates probed for EGFR, ERK1/2 and p-ERK1/2. **B.** Transduced HeLa cells were immunoblotted for EGFR, transferrin receptor (TFRC) and RIN1.

**A**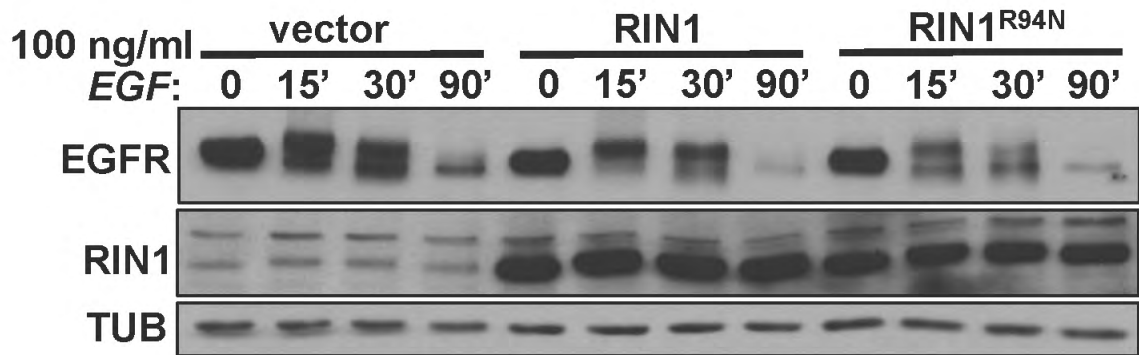**B**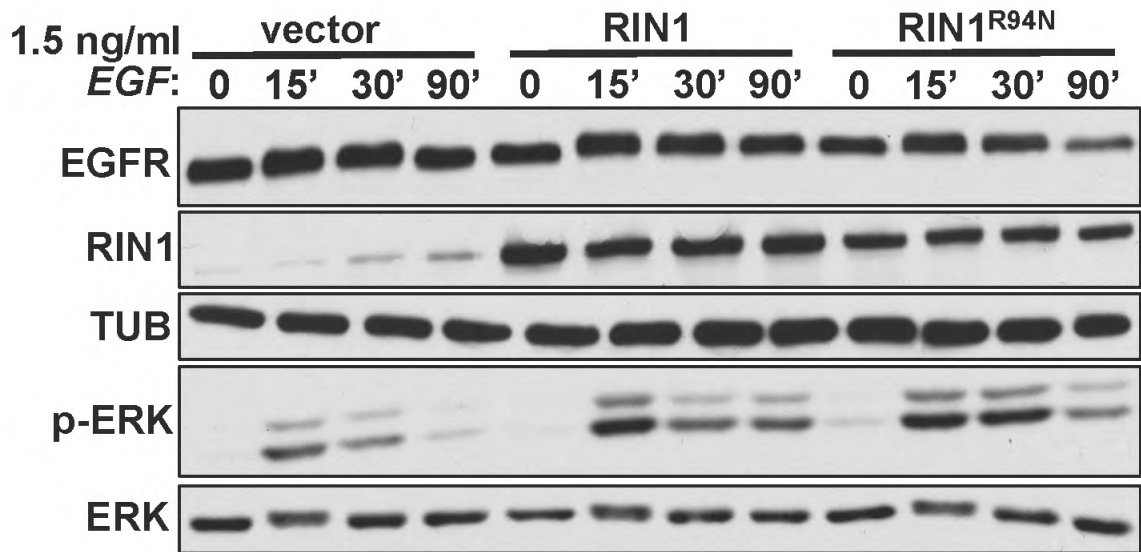

**Fig. S6. RIN1<sup>R94N</sup> does not alter EGFR signaling through p-ERK.** **A.** Vector, RIN1 or RIN1<sup>R94N</sup> HeLa cells were stimulated with 100 ng/ml EGF for the indicated time and lysates immunoblotted for EGFR, RIN1 or TUB. EGFR activation was confirmed by p-ERK immunoblot (data not shown). **B.** Vector, RIN1 or RIN1<sup>R94N</sup> HeLa cells stimulated with 1.5 ng/ml EGF for the indicated time and lysates immunoblotted for EGFR, RIN1, TUB, total ERK1/2 or p-ERK1/2.

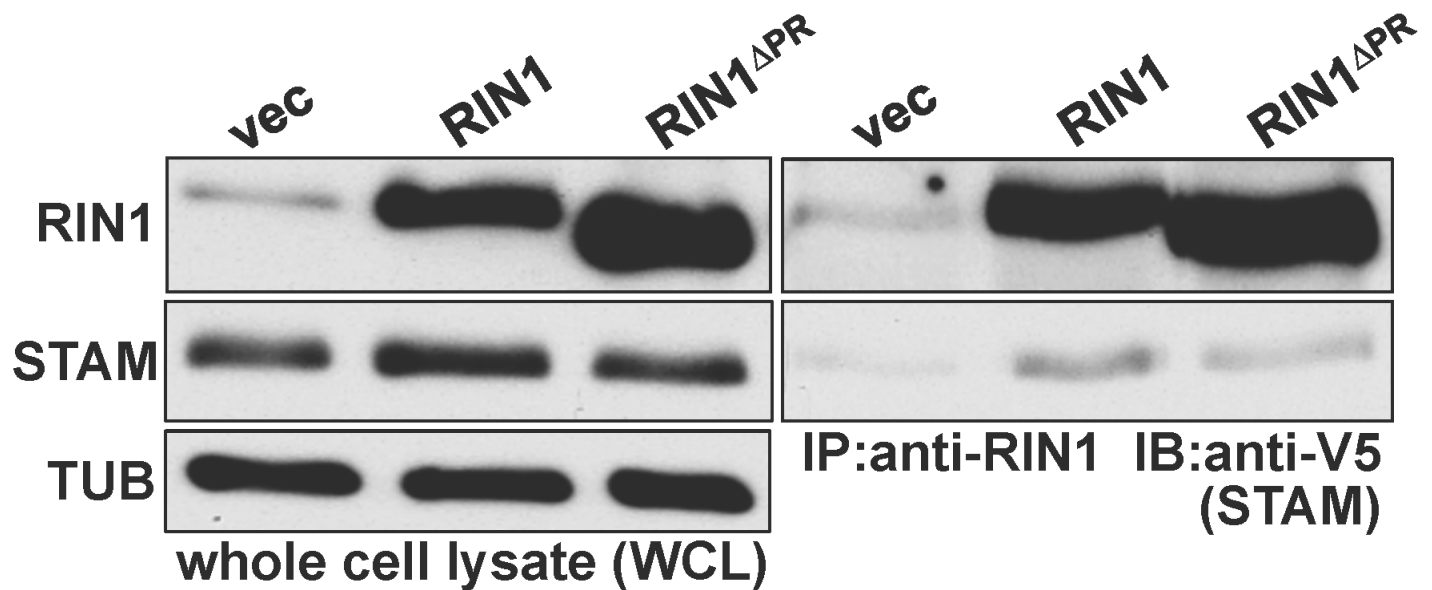

**Fig. S7.  $\Delta$ PR mutation reduces the RIN1::STAM interaction.** HeLa cells were transduced with vector, RIN1 or RIN1 $\Delta$ PR. Cell lysates and RIN1 immunoprecipitates were blotted for V5 (STAM) or RIN1.

**Table S1.** Characterization of RIN1 mutant proteins used in this work. The RIN1 $\Delta$ PR mutant used in these studies (construction described in the Methods section) is similar but not identical to a mutant described in Kong et al., 2007.

| Mutant                | Defect                                                                                                                 | Further characterization                                                                                                                                                           |
|-----------------------|------------------------------------------------------------------------------------------------------------------------|------------------------------------------------------------------------------------------------------------------------------------------------------------------------------------|
| RIN1 <sup>E574A</sup> | Reduced GEF activity (Galvis et al., 2009a, Galvis et al., 2009b, Hu et al., 2008)<br>(can not activate RAB5)          | Still binds to activated (GTP-bound) RAS (Hu et al., 2008)<br>Still binds to activated (p-Tyr) EGFR (Hu et al., 2008)<br>Still activates ABL tyrosine kinases ( <i>this work</i> ) |
| RIN1 <sup>QM</sup>    | Reduced ABL interaction (Hu et al., 2005, Hu et al., 2008)<br>(does not stimulate ABL)                                 | Still binds activated (GTP-bound) RAS (Hu et al., 2008)<br>Still binds to RAB5 <sup>S34N</sup> (GDP-bound) (Hu et al., 2008)                                                       |
| RIN1 <sup>S351A</sup> | Reduced 14-3-3 interaction (Doppler et al., 2005, Wang et al., 2002, Ziegler et al., 2011) (increased PM localization) | Still binds activated (GTP-bound) RAS (Wang et al., 2002)<br>Still binds to activated (p-Tyr) EGFR (Hu et al., 2008)                                                               |
| RIN1 <sup>R94N</sup>  | Reduced EGFR interaction (Barbieri et al., 2003, Hu et al., 2008)<br>(SH2 cannot bind pTyr)                            | Still binds RAS and RAB5 (SH2 deletion) (Barbieri et al., 2003)<br>Still binds to activated (p-Tyr) EGFR (Hu et al., 2008)                                                         |
| RIN1 $\Delta$ PR      | Reduced STAM binding (Kong et al., 2007) Reduced BIN1 binding ( <i>this work</i> )                                     |                                                                                                                                                                                    |
